# Supplementary material for: Plasmonic bimetallic nanodisk arrays for DNA conformation sensing
Source: Royal Society of Chemistry journal article supplement (doi:10.1039/c9nr06101k), 2019-01-01
Supplement: c9nr06101k1.pdf [file c9nr06101k1.pdf]

Electronic Supplementary Information (ESI)

## **Plasmonic Bimetallic Nanodisk Arrays for DNA Conformation Sensing**

Thanh Thi Van Nguyen,<sup>a</sup> Xiaoji Xie,<sup>b</sup> Jiahui Xu,<sup>b</sup> Yiming Wu,<sup>b</sup> Minghui Hong<sup>c</sup> and  
Xiaogang Liu<sup>\*,b,d,e</sup>

<sup>a</sup> *Advanced Materials for Micro- and Nano-Systems Programme, Singapore-MIT Alliance, Singapore 117576.* <sup>b</sup> *Department of Chemistry, National University of Singapore, 3 Science Drive 3, Singapore 117543.* <sup>c</sup> *Department of Electrical and Computer Engineering, National University of Singapore, Singapore 117576.* <sup>d</sup> *The N.1 Institute for Health, National University of Singapore, 28 Medical Dr. #05-COR, Singapore 117456.* <sup>e</sup> *Joint School of National University of Singapore and Tianjin University, International Campus of Tianjin University, Fuzhou, 350207, P. R. China*

## DNA sequences

| Name                                       | Description                  | Sequence                                                                                                         |
|--------------------------------------------|------------------------------|------------------------------------------------------------------------------------------------------------------|
| <b>Single-stranded DNA detection</b>       |                              |                                                                                                                  |
| a                                          | Capture DNA                  | 5'-[thiolC6]AAACGGGAGGCAGTG-3'                                                                                   |
| b                                          | Capture DNA                  | 5'-ATAAATCACTCAAAA[thiolC3]-3'                                                                                   |
| t                                          | Target DNA                   | 3'-GCCCTCCGTCACTATTTAGTGAGT-5'                                                                                   |
| t'                                         | Non-complementary target DNA | 5'-ACCTGGAGGAGTATTGCGGAGGAAGGT-3'                                                                                |
| <b>Different DNA length strands</b>        |                              |                                                                                                                  |
| a1                                         | Capture DNA                  | 5'-[thiolC6]CTAGAAGGACCTCTT-3'                                                                                   |
| b1                                         | Capture DNA                  | 5'-ATTCGATCCTTTCTA[thiolC3]-3'                                                                                   |
| t1                                         | 24-base target DNA           | 5'-AAAGGATCGAATAAGAGGTCCTTC-3'                                                                                   |
| t2                                         | 48-base target DNA           | 5'-AAAGGATCGAATCCGTTAAGACGAGGCAATCATGCA<br>AAGAGGTCCTTC-3'                                                       |
| t3                                         | 72-base target DNA           | 5'-AAAGGATCGAATCCGTTAAGACGAGGCAATCATGCA<br>TATATTGGCCGCTTT AGCGACAACAAGAGGTCCTTC-3'                              |
| t4                                         | 96-base target DNA           | 5'-AAAGGATCGAATCCGTTAAGACGAGGCAATCATGCA<br>TATATTGGCCGCTTTAGCGACAACCTCATGTACGTATGTAGGATCCGAAAGAGGTCC<br>TTC-3'   |
| <b>Different DNA configuration strands</b> |                              |                                                                                                                  |
| a2                                         | Capture DNA                  | 5'-[ThiolC6]TTTTTTTTTTTTTTTTTTT-3'                                                                               |
| b2                                         | Capture DNA                  | 5'-TTTTTTTTTTTTTTTTTTTT[ThiolC3]-5'                                                                              |
| 1L#                                        | Linear strand                | 5'-A17TCGGATCCTACGTAGGAATTA19-3'                                                                                 |
| 2L#                                        | Linear strand                | 5'-A18TCGGATCCTATCGAACTGCATAAGCGCACTCGTA<br>GGAATTA18-3'                                                         |
| 3L#                                        | Linear strand                | 5'-A20 TCGGATCCTACATACGTACATGAGCATTACTCGA<br>ACTGCATAAGC GCACTCGTAGGAATTA19-3'                                   |
| 1B#                                        | Bulge strand                 | 5'-A15 TCGGATCCTA <u>AAA</u> CGTAGGAATTA16-3'                                                                    |
| 2B#                                        | Bulge strand                 | 5'-A15 TCGGATCCTA <u>AAA</u> TCGAACTGCATAAGCGCACT<br><u>AAA</u> CGTAGGAATT A15-3'                                |
| 3B#                                        | Bulge strand                 | 5'-A15 TCGGATCCTA <u>AAA</u> CATACGTACATGAGCATTAC<br><u>AAAT</u> CGAACTGC TAAGCGCACT <u>AAA</u> CGTAGGAATTA15-3' |
| 1K#                                        | Linker strand                | 3'-AGCCTAGGATGCATCCTTAA-5'                                                                                       |
| 2K#                                        | Linker strand                | 3'-AGCCTAGGATAGCTTGACGTATTCGCGTGAGCATCC                                                                          |

|     |               |                                                                         |
|-----|---------------|-------------------------------------------------------------------------|
|     |               | TTAA-5'                                                                 |
| 3K# | Linker strand | 3'-AGCCTAGGATGTATGCATGTACTCGTAATGAGCT<br>TGACGTATTCGCGT GAGCATCCTTAA-5' |
| G-Q | G-quadruplex  | 5'-A15TGGG(T <sub>2</sub> AG <sub>3</sub> ) <sub>3</sub> A15-3'         |

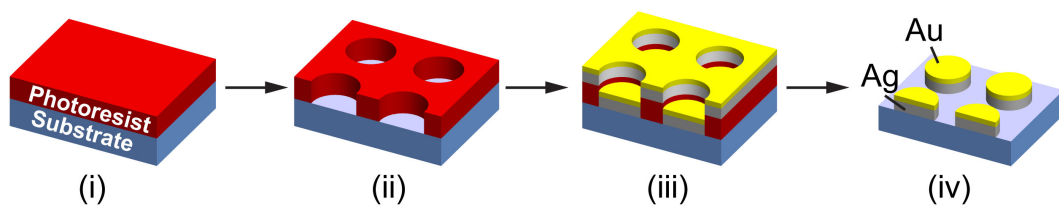

**Figure S1.** Schematic presentation of the fabrication process: (i) photoresist coating, (ii) LIL exposure and development, (iii) metal coating, and (iv) lift-off.

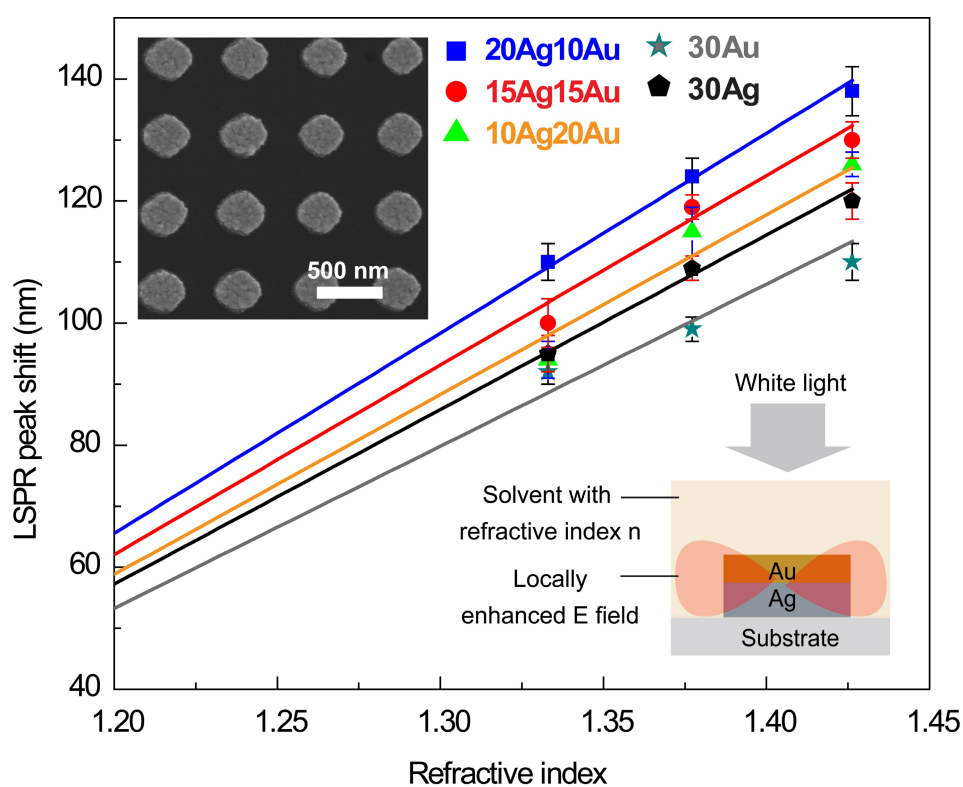

**Figure S2.** LSPR peak shifts versus the refractive index of surrounding media for different nanodisk structures. 30Au and 30Ag nanodisk structures were fabricated for comparison. The measured points at  $n = 1.0$  (ambient air) are not showed in the refractive index range.

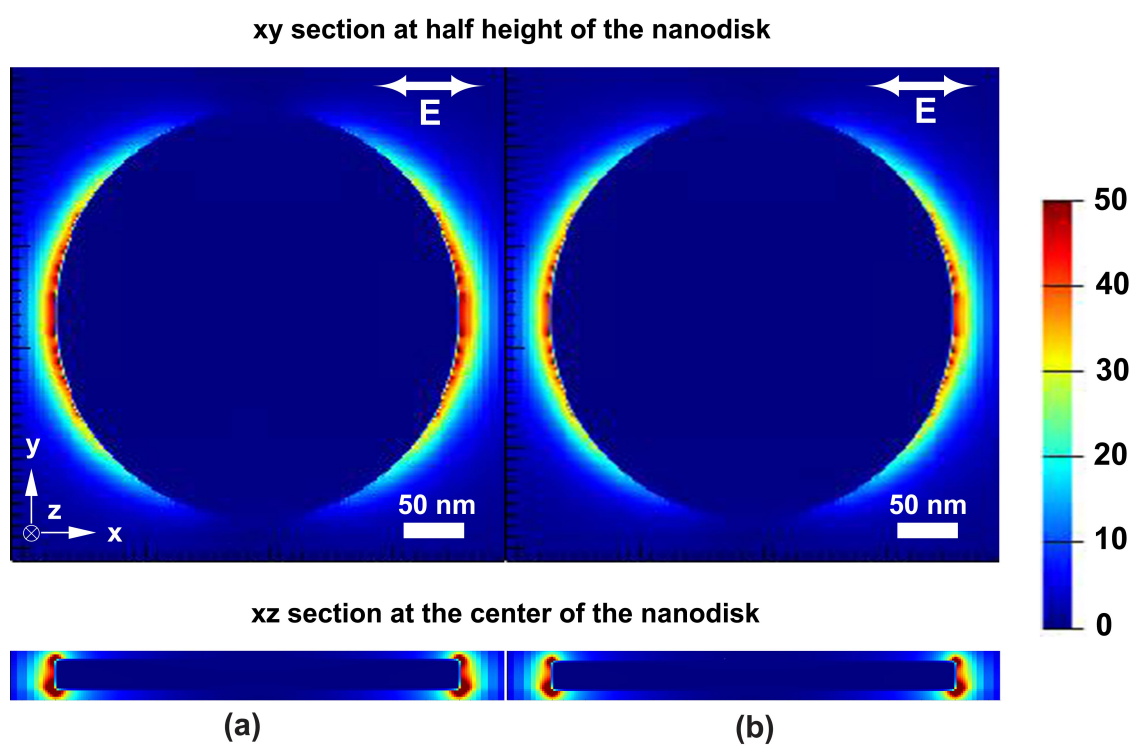

**Figure S3.** FDTD simulated field distribution of (a) 20Ag10Au and (b) 10Ag20Au nanodisks at xy and xz sections, respectively.

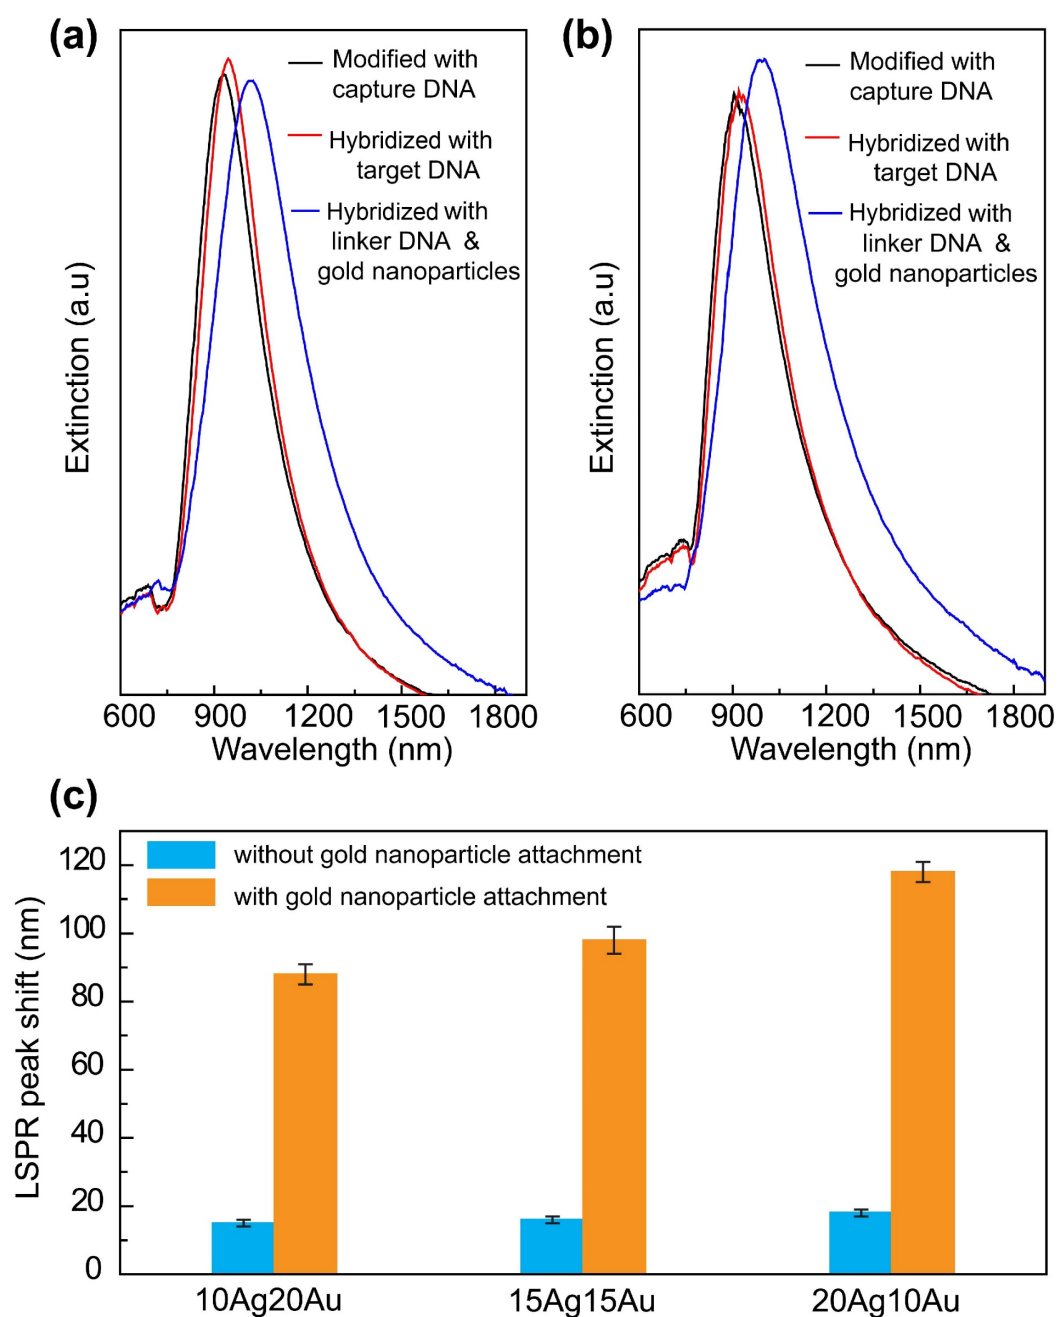

**Figure S4.** Extinction spectra of (a) 10Ag20Au and (b) 15Ag15Au nanodisk arrays after each of modification step and (c) The LSPR shift enhancement by gold nanoparticle attachments of 3 different nanodisk structures.

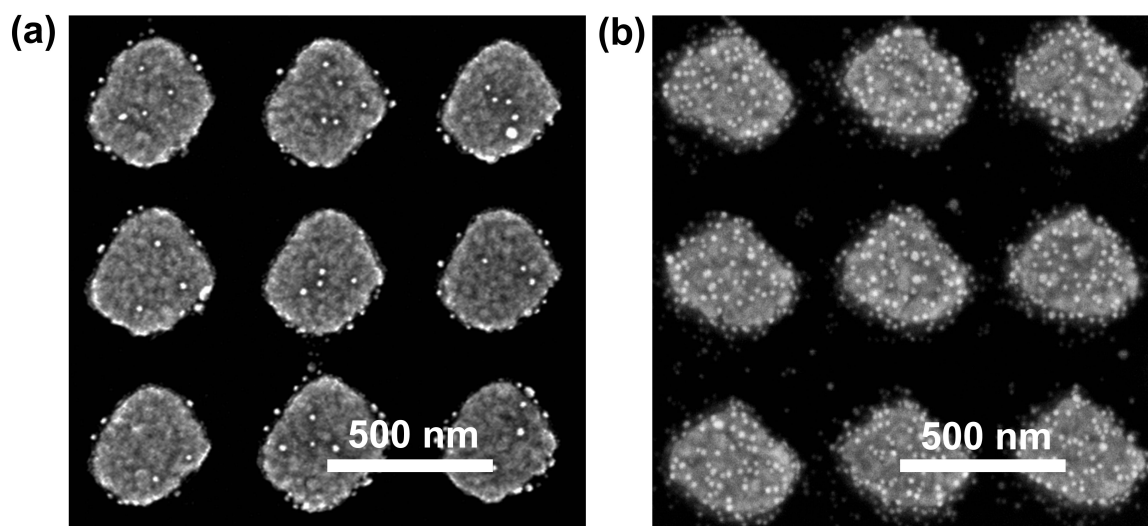

**Figure S5.** SEM images of 20Ag10Au nanodisk arrays after attaching DNA-modified gold nanoparticles with (a) 1 pM and (b) 100 nM concentration of target ssDNA.

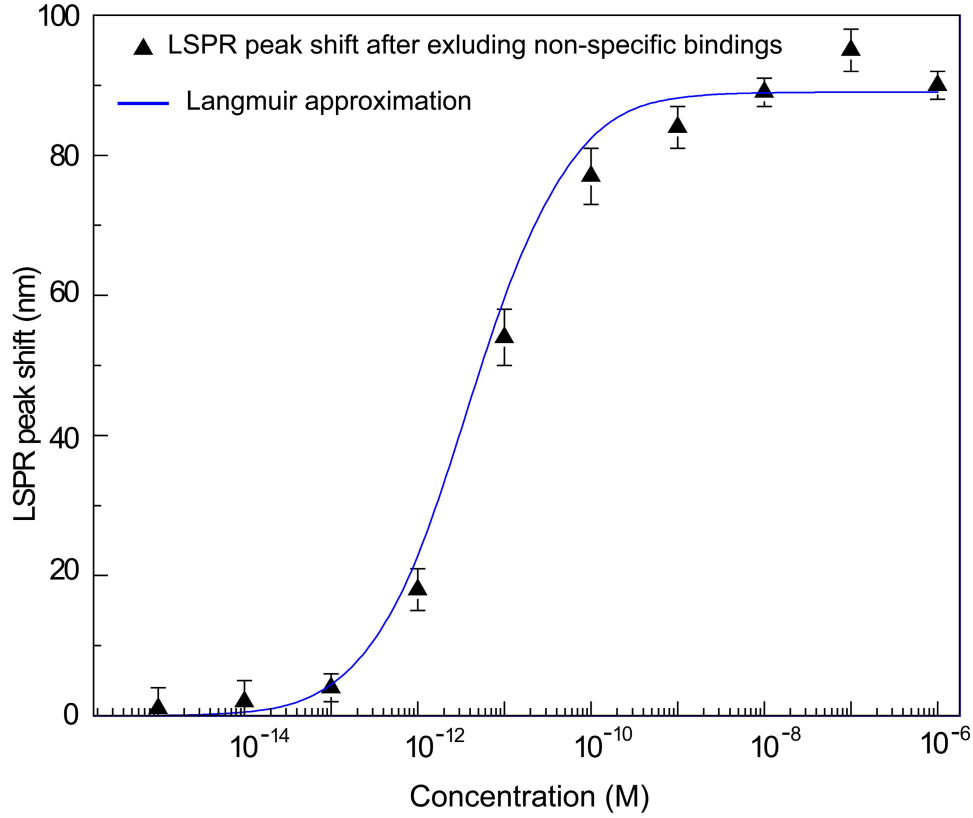

**Figure S6.** The sensitivity of the plasmon enhancement platform for ssDNA sensing. Black triangle: the LSPR peak shifts at various concentrations of target ssDNA after excluding the effects of nonspecific-binding. Blue curve: quantitative response curve for DNA-modified gold nanoparticles binding to DNA-modified nanodisks upon the DNA hybridization. Note: the sensitivity is calculated according to Langmuir adsorption equation:  $\Delta R = \Delta R_{\max} \frac{K_a \times C[\text{DNA}]}{1 + K_a \times C[\text{DNA}]}$ , where  $\Delta R = \Delta\lambda_{\max}$ , LSPR shift at a given concentration,  $\Delta R_{\max}$  is the maximum LSPR response at high concentrations,  $K_a$  is the surface-confined thermodynamic affinity constant, and  $C[\text{DNA}]$  is the concentration of target DNA solution.



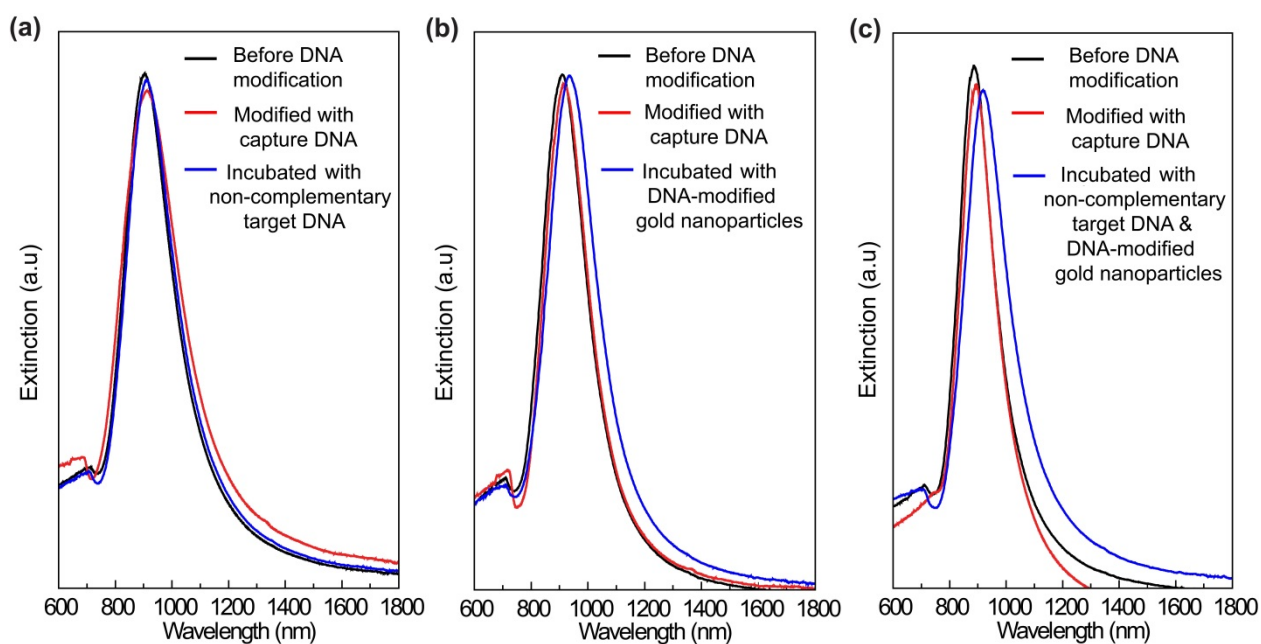

**Figure S7.** LSPR extinction spectra of 20Ag10Au nanodisk structures illustrate nonspecific bindings of DNA modified nanodisks interacting with (a) non-complementary target DNA, (b) DNA-modified gold nanoparticles, (c) non-complementary target DNA and DNA-modified gold nanoparticles.

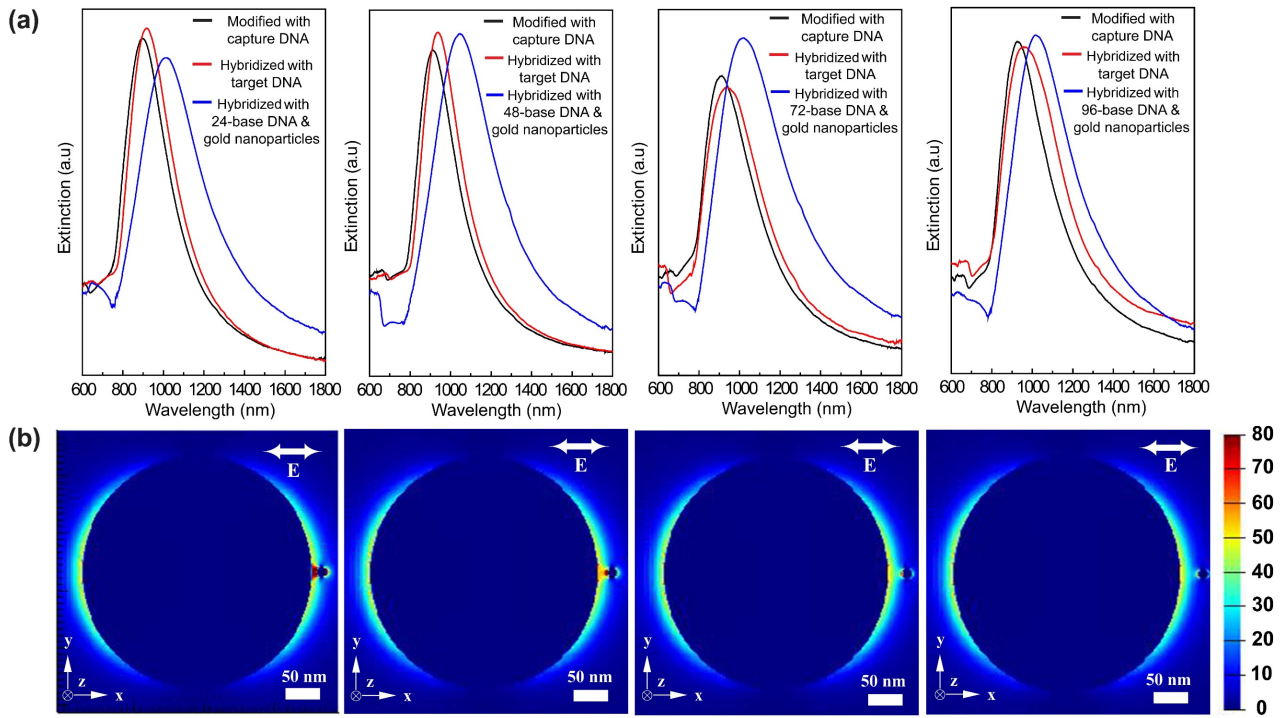

**Figure S8** (a) Experimental extinction spectra of 20Ag10Au nanodisk arrays at each step in the surface modification with different length linker DNAs: (from left to right) 24-base, 48-base, 72-base, and 96-base DNA. (b) FDTD simulation of plasmonic interaction between a 20Ag10Au nanodisk and a gold nanoparticle with the gap between them equating to the length of linker DNAs, (from left to right) 7.2 nm, 14.4 nm, 21.6 nm, and 28.8 nm respectively.

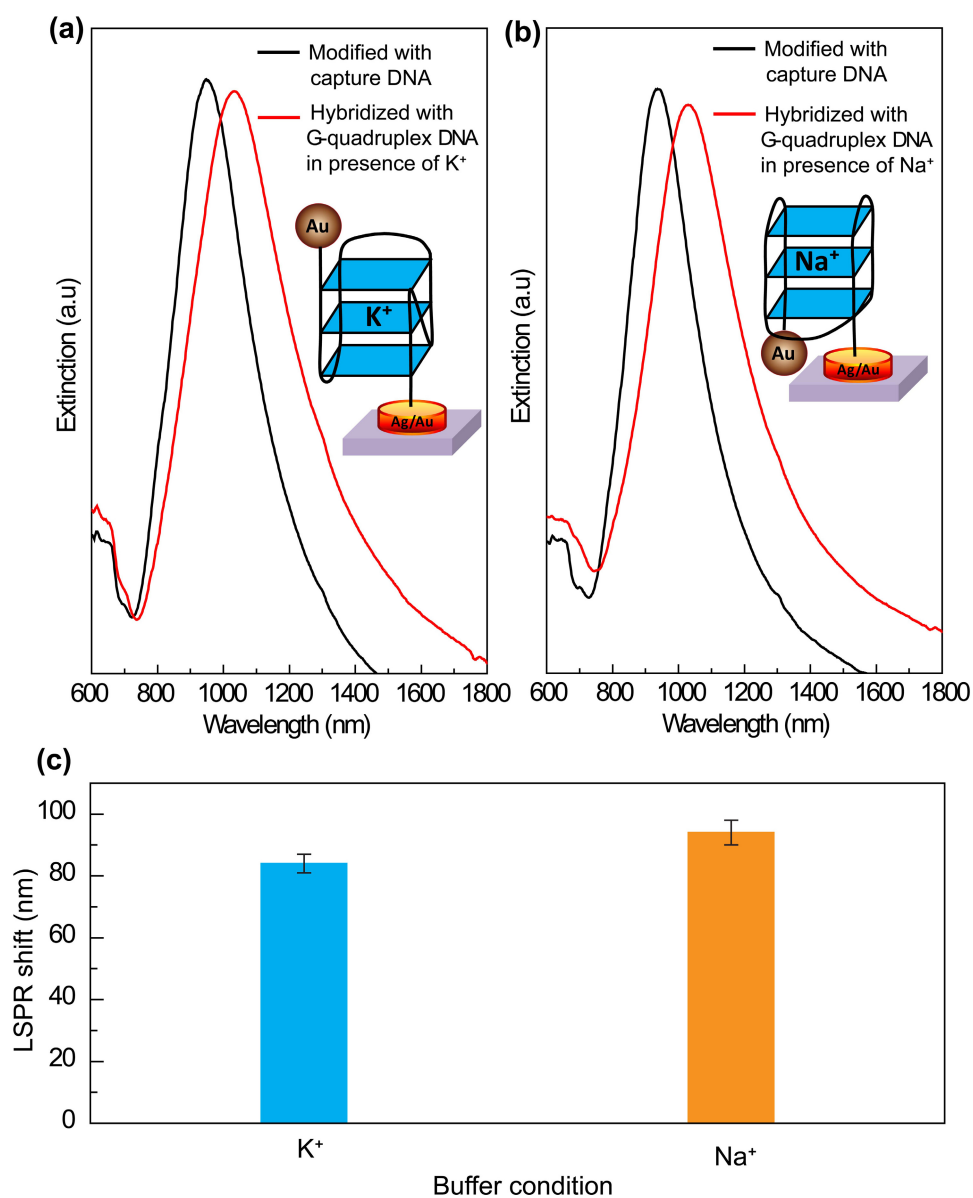

**Figure S9.** Extinction spectra of 20Ag10Au nanodisk arrays after DNA-modified gold nanoparticle attachment by G-quadruplex DNA in the presence of (a)  $K^+$  and (b)  $Na^+$  buffer; and (c) the corresponding LSPR shifts.
